# Supplementary material for: Sex-Specific Signature in the Circulating NLRP3 Levels of Saudi Adults with Metabolic Syndrome
Source: MDPI journal article supplement (doi:10.3390/jcm10153288), 2021-07-26
Supplement: s1 [file s1]

# Sex-specific Signature in the Circulating NLRP3 Levels of Saudi Adults with Metabolic Syndrome

Nasser M. Al-Daghri, Kaiser Wani, Hind AlHarthi, Amani Alghamdi, Abdullah M. Alnaami, Sobhy M. Yakout

**Table S1.** Anthropometric and biochemical characteristics of the study subjects

| Parameters               | Non-MetS          | MetS              | P               |
|--------------------------|-------------------|-------------------|-----------------|
| N (F/M)                  | 101 (50/51)       | 99 (56/43)        | 0.33            |
| Age (years)              | 35.49 ± 8         | 41.94 ± 7.3       | <b>&lt;0.01</b> |
| BMI (kg/m <sup>2</sup> ) | 28.3 ± 6.6        | 31.87 ± 5.1       | <b>&lt;0.01</b> |
| Waist (cm)               | 87.43 ± 14.7      | 108.05 ± 14.5     | <b>&lt;0.01</b> |
| WHR                      | 0.84 ± 0.1        | 0.99 ± 0.2        | <b>&lt;0.01</b> |
| Systolic (mmHg)          | 116.63 ± 12       | 130.6 ± 17.1      | <b>&lt;0.01</b> |
| Diastolic (mmHg)         | 71.01 ± 9.4       | 78.99 ± 11.2      | <b>&lt;0.01</b> |
| T.Chol (mmol/l)          | 5.22 ± 0.9        | 5.46 ± 1.6        | 0.19            |
| FBG (mmol/l)             | 5.23 ± 0.9        | 7.19 ± 3.3        | <b>&lt;0.01</b> |
| HDL- C(mmol/l)           | 1.24 ± 0.3        | 1.02 ± 0.3        | <b>&lt;0.01</b> |
| Trigly. (mmol/l)         | 1.19 (0.9,1.5)    | 2.33 (1.9,2.8)    | <b>&lt;0.01</b> |
| Vitamin D                | 42.39 (28.5,59.8) | 41.95 (25.8,64.9) | 0.77            |
| Insulin (μU/ml)          | 8.06 (4.2,14.4)   | 17.28 (7.1,45.1)  | <b>&lt;0.01</b> |
| HOMA-IR                  | 1.75 (1,3.8)      | 6.31 (2,11.6)     | <b>&lt;0.01</b> |
| QuickI                   | 0.63 (0.5,0.7)    | 0.46 (0.4,0.6)    | <b>&lt;0.01</b> |
| IL-18(pg/ml)             | 64.09 (36.6,88.6) | 48.59 (34,72.5)   | 0.17            |
| TNF-α (pg/ml)            | 0.46 (0.2,1.2)    | 1.44 (0.8,1.8)    | <b>&lt;0.01</b> |
| IL-1β (pg/ml)            | 0.5 (0.4,0.9)     | 1.37 (1,2.9)      | <b>&lt;0.01</b> |
| CRP (μg/ml)              | 2.01 (0.59,4.2)   | 4.62 (1.7,6.2)    | <b>&lt;0.01</b> |
| NLRP3 (ng/dl)            | 8.65 (3.9,11.2)   | 6.35 (4.0,11.8)   | 0.82            |

Note: Data is presented as frequency, mean ± standard deviation and median (Q1, Q3) for categorical, normal continuous and non-normal continuous variables respectively. The statistical differences in each variable between the three groups, calculated by appropriate statistical tests, are presented as p-value.

**Table S2.** Anthropometric and biochemical characteristics of the study groups on gender basis

| Parameters               | Non-MetS<br>(N=51) | MetS (N=43)       | p               | Non-MetS<br>(N=50) | MetS (N=56)       | p               |
|--------------------------|--------------------|-------------------|-----------------|--------------------|-------------------|-----------------|
|                          | Males (94)         |                   |                 | Females (106)      |                   |                 |
| Age (years)              | 35.27 ± 7.8        | 41.67 ± 7.2       | <b>&lt;0.01</b> | 35.7 ± 8.2         | 42.14 ± 7.4       | <b>&lt;0.01</b> |
| BMI (kg/m <sup>2</sup> ) | 26.61 ± 5.6        | 30.73 ± 4.3       | <b>&lt;0.01</b> | 30.03 ± 7          | 32.75 ± 5.5       | <b>0.03</b>     |
| Waist (cm)               | 92.04 ± 16.9       | 110.34 ± 15       | <b>&lt;0.01</b> | 82.72 ± 10.2       | 102.21 ± 15.1     | <b>&lt;0.01</b> |
| WHR                      | 0.91 ± 0.1         | 1 ± 0.1           | <b>&lt;0.01</b> | 0.76 ± 0.1         | 0.98 ± 0.2        | <b>&lt;0.01</b> |
| Sys (mmHg)               | 119.8 ± 12.3       | 130.49 ± 11.8     | <b>&lt;0.01</b> | 113.4 ± 10.9       | 130.68 ± 20.4     | <b>&lt;0.01</b> |
| Dias (mmHg)              | 69.69 ± 9.4        | 76.58 ± 10.2      | <b>0.001</b>    | 72.36 ± 9.4        | 80.84 ± 11.7      | <b>&lt;0.01</b> |
| T.Chol (mmol/l)          | 5.24 ± 0.9         | 5.42 ± 1.5        | 0.49            | 5.2 ± 1            | 5.5 ± 1.7         | 0.27            |
| FBG (mmol/l)             | 5.22 ± 0.5         | 7.76 ± 3.7        | <b>&lt;0.01</b> | 5.23 ± 1.2         | 6.75 ± 3          | <b>0.001</b>    |
| HDL-C(mmol/l)            | 1.13 ± 0.2         | 0.87 ± 0.2        | <b>&lt;0.01</b> | 1.34 ± 0.3         | 1.12 ± 0.3        | <b>&lt;0.01</b> |
| Trigly.(mmol/l)          | 1.33 (0.9,1.7)     | 2.42 (2,3.4)      | <b>&lt;0.01</b> | 1.07 (0.8,1.5)     | 2.21 (1.8,2.6)    | <b>&lt;0.01</b> |
| Vit.D (nmol/l)           | 44.97 (31.6,61.5)  | 36.01 (24.5,55.3) | 0.05            | 33.28 (23,56.2)    | 50.58 (27.1,73.8) | <b>0.04</b>     |
| Insulin (μU/ml)          | 11.2 (6.1,17.7)    | 18 (6.7,52)       | 0.93            | 5.72 (3.4,10.8)    | 17.28 (7.1,36.8)  | <b>&lt;0.01</b> |
| HOMA-IR                  | 2.77 (1.6,4.2)     | 6.91 (1.8,14.9)   | <b>0.01</b>     | 1.33 (0.7,2.4)     | 5.2 (2.3,9.6)     | <b>&lt;0.01</b> |
| QuickI                   | 0.56 (0.5,0.6)     | 0.46 (0.4,0.6)    | <b>0.01</b>     | 0.68 (0.6,0.8)     | 0.48 (0.4,0.6)    | <b>&lt;0.01</b> |
| IL-18(pg/ml)             | 40.07 (26,63.5)    | 54.05 (40.3,89.9) | <b>0.008</b>    | 77.59 (61.9,100.8) | 42.18 (32.4,66.9) | <b>&lt;0.01</b> |
| TNF-α (pg/ml)            | 0.21 (0.1,0.3)     | 1.31 (0.9,1.6)    | <b>&lt;0.01</b> | 0.86 (0.4,1.5)     | 1.54 (0.7,1.9)    | <b>0.007</b>    |
| IL-1β (pg/ml)            | 0.43 (0.2,0.6)     | 1.34 (1.1,3.4)    | <b>&lt;0.01</b> | 0.78 (0.4,1.6)     | 1.37 (1,2.7)      | <b>&lt;0.01</b> |
| CRP (μg/ml)              | 1.81 (0.74,4.09)   | 4.62 (1.9,6.2)    | <b>0.001</b>    | 2.37 (0.5,4.5)     | 4.54 (1.3,6.2)    | <b>0.009</b>    |
| NLRP3 (ng/dl)            | 10.4 (8.3,11.4)    | 5.7 (4.0,11.3)    | <b>0.014</b>    | 4.6 (3.3,9)        | 7.6 (3.7,13.7)    | <b>0.04</b>     |

Note: Data is presented as frequency, mean ± standard deviation and median (Q1, Q3) for categorical, normal continuous and non-normal continuous variables respectively. The statistical differences in each variable between the three groups, calculated by appropriate statistical tests, are presented as p-value.
